# Supplementary material for: Effects of Whole Milk Supplementation on Gut Microbiota and Cardiometabolic Biomarkers in Subjects with and without Lactose Malabsorption
Source: PubMed Central journal article supplement (PMC6213503; doi:10.3390/nu10101403), 2018-10-02
Supplement: nutrients-10-01403-s001.pdf [file nutrients-10-01403-s001.pdf]

## Supplementary material

### Supplementary figure

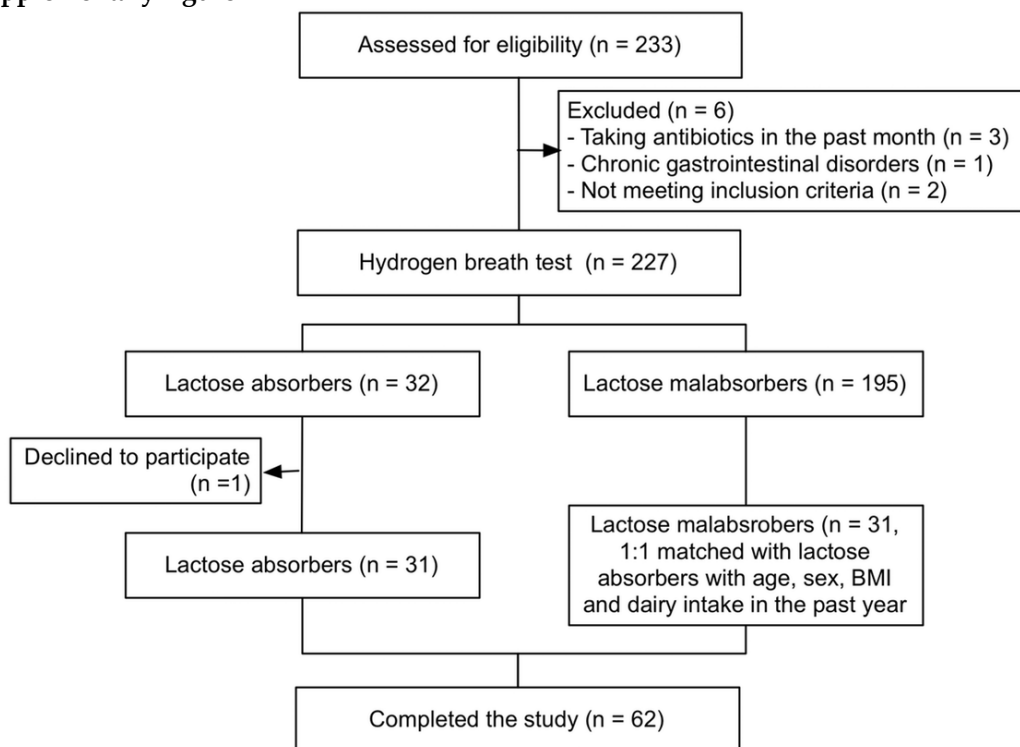

Figure S1. Flow chart of the participant recruitment and withdraw

### Supplementary tables

Table S1. Dietary energy and nutrients intake based on a three-day food records at baseline and following 4-week supplementation of whole milk<sup>1</sup>

| Nutrients          | LM (n=31)   |             | LA (n=31)   |             |
|--------------------|-------------|-------------|-------------|-------------|
|                    | Pre         | Post        | Pre         | Post        |
| Energy (Kcal)      | 2035 ± 47   | 2089 ± 61   | 1981 ± 52   | 2046 ± 64   |
| Protein (g)        | 64.5 ± 2.7  | 66.4 ± 2.8  | 63.2 ± 3.6  | 63.8 ± 4.3  |
| Protein (E %)      | 12.7 ± 0.4  | 12.6 ± 0.3  | 12.7 ± 0.4  | 12.5 ± 0.5  |
| Fat (g)            | 81.4 ± 2.4  | 86.3 ± 3.0  | 79.3 ± 2.9  | 84.3 ± 2.9  |
| Fat (E %)          | 36.1 ± 0.7  | 37.3 ± 0.8  | 36.0 ± 1.0  | 37.1 ± 0.8  |
| Carbohydrate (g)   | 261.0 ± 7.3 | 261.0 ± 9.2 | 250.6 ± 7.8 | 257.8 ± 8.7 |
| Carbohydrate (E %) | 51.3 ± 0.7  | 49.8 ± 0.9  | 50.7 ± 1.1  | 50.4 ± 1.0  |
| Fiber (g)          | 8.6 ± 0.6   | 8.2 ± 0.7   | 9.4 ± 0.9   | 8.6 ± 0.5   |
| Calcium (mg)       | 349 ± 26    | 568 ± 25*   | 344 ± 28    | 541 ± 29*   |

<sup>1</sup>LM lactose malabsorbers, LA lactose absorbers, E % energy percentage. \*P < 0.05.

**Table S2.** Comparison of gut microbiota composition at the phylum and genus level between lactose malabsorbers (LM) and absorbers (LA)

| <b>Taxa</b>                      | <b>LM (n=31)</b> | <b>LA (n=29)</b> | <b>P</b> |
|----------------------------------|------------------|------------------|----------|
| <b>Phylum</b>                    |                  |                  |          |
| Firmicutes (%)                   | 59.6 ± 2.5       | 61.4 ± 3.0       | 0.34     |
| Bacteroidetes (%)                | 36.5 ± 2.5       | 35.1 ± 3.0       | 0.42     |
| Proteobacteria (%)               | 2.2 ± 0.5        | 2.1 ± 0.5        | 0.91     |
| Actinobacteria (%)               | 0.8 ± 0.2        | 0.9 ± 0.2        | 0.77     |
| <b>Genus</b>                     |                  |                  |          |
| <i>Bacteroides</i> (%)           | 23.0 ± 2.6       | 18.5 ± 2.7       | 0.23     |
| <i>Prevotella</i> (%)            | 10.3 ± 3.1       | 14.0 ± 3.8       | 0.57     |
| <i>Faecalibacterium</i> (%)      | 14.9 ± 1.8       | 11.0 ± 1.5       | 0.95     |
| <i>Megamonas</i> (%)             | 7.8 ± 2.6        | 9.9 ± 2.3        | 0.80     |
| <i>Roseburia</i> (%)             | 8.6 ± 1.3        | 9.3 ± 1.5        | 0.85     |
| <i>Clostridium</i> (%)           | 2.5 ± 0.3        | 2.3 ± 0.3        | 0.15     |
| <i>Ruminococcus</i> (%)          | 2.0 ± 0.3        | 3.1 ± 0.6        | 0.60     |
| <i>Dialister</i> (%)             | 2.3 ± 0.6        | 2.5 ± 0.8        | 0.46     |
| <i>Phascolarctobacterium</i> (%) | 3.8 ± 1.2        | 1.0 ± 0.3        | 0.83     |
| <i>Blautia</i> (%)               | 1.5 ± 0.2        | 2.6 ± 0.5        | 0.58     |
| <i>Eubacterium</i> (%)           | 1.7 ± 0.3        | 2.3 ± 0.4        | 0.23     |
| <i>Gemmiger</i> (%)              | 1.5 ± 0.3        | 1.6 ± 0.3        | 0.50     |
| <i>Bifidobacterium</i> (%)       | 0.6 ± 0.2        | 0.5 ± 0.2        | 0.79     |
| <i>Lactobacillus</i> (%)         | 0.8 ± 0.3        | 1.5 ± 0.7        | 0.61     |

**Table S3.** Comparison of changes in cardiometabolic biomarkers between groups based on changes in *Bifidobacterium* abundance among lactose malabsorbers<sup>1</sup>

| <b>Parameters</b>        | <b>Bif LO (n=16)</b> | <b>Bif HI (n=15)</b> | <b>P</b> |
|--------------------------|----------------------|----------------------|----------|
| Weight (kg)              | -0.25 ± 0.23         | -0.26 ± 0.25         | 0.98     |
| BMI (kg/m <sup>2</sup> ) | 0.10 ± 0.16          | -0.28 ± 0.13         | 0.07     |
| Body fat mass (kg)       | -0.59 ± 0.53         | -1.99 ± 0.82         | 0.29     |
| Lean mass (kg)           | 0.68 ± 0.65          | 0.85 ± 0.38          | 0.94     |
| Body fat (%)             | -1.11 ± 0.94         | -2.95 ± 1.14         | 0.26     |
| DBP (mmHg)               | -3.25 ± 2.01         | 1.07 ± 1.78          | 0.12     |
| SBP (mmHg)               | -2.06 ± 2.37         | -0.80 ± 2.49         | 0.72     |
| FPG (mmol/L)             | 0.09 ± 0.08          | 0.03 ± 0.09          | 0.65     |
| FPI (mU/L)               | 0.21 ± 0.79          | 0.81 ± 0.75          | 0.59     |
| HOMA-IR                  | 0.10 ± 0.19          | 0.20 ± 0.17          | 0.70     |
| C-peptide (nmol/L)       | -0.02 ± 0.03         | 0.00 ± 0.02          | 0.51     |
| TG (mmol/L)              | 0.20 ± 0.05          | 0.09 ± 0.05          | 0.12     |
| TC (mmol/L)              | 0.01 ± 0.09          | -0.12 ± 0.14         | 0.43     |
| LDL-C (mmol/L)           | 0.12 ± 0.09          | -0.11 ± 0.18         | 0.26     |
| HDL-C (mmol/L)           | -0.03 ± 0.06         | 0.05 ± 0.06          | 0.36     |
| CRP (µg/mL)              | -0.12 ± 0.28         | 0.40 ± 0.37          | 0.43     |
| MDA (nmol/mL)            | 0.24 ± 0.25          | -0.42 ± 0.31         | 0.11     |

<sup>1</sup>*Bif LO* change in the *Bifidobacterium* abundance below the median, *Bif HI* change in the *Bifidobacterium* abundance above the median, *BMI* body mass index, *DBP* diastolic blood pressure, *SBP* systolic blood pressure, *FPG* fasting plasma glucose, *FPI* fasting plasma insulin, *HOMA-IR* homeostasis model assessment of insulin resistance, *TG* triglycerides, *TC* total cholesterol, *LDL-C* low-density lipoprotein cholesterol, *HDL-C* high-density lipoprotein cholesterol, *CRP* C-reactive protein, *MDA* malondialdehyde

**Table S4.** Comparison of changes in cardiometabolic biomarkers between groups based on changes in *Anaerostipes* abundance among lactose malabsorbers<sup>1</sup>

| <b>Parameters</b>        | <b>Ana LO (n=16)</b> | <b>Ana HI (n=15)</b> | <b>P</b> |
|--------------------------|----------------------|----------------------|----------|
| Weight (kg)              | -0.21 ± 0.23         | -0.31 ± 0.25         | 0.77     |
| BMI (kg/m <sup>2</sup> ) | -0.23 ± 0.12         | 0.07 ± 0.17          | 0.24     |
| Body fat mass (kg)       | -2.03 ± 0.80         | -0.46 ± 0.50         | 0.39     |
| Lean mass (kg)           | 1.38 ± 0.63          | 0.11 ± 0.33          | 0.58     |
| Body fat (%)             | -3.29 ± 1.21         | -0.62 ± 0.71         | 0.30     |
| DBP (mmHg)               | 0.50 ± 1.50          | -2.93 ± 2.33         | 0.22     |
| SBP (mmHg)               | -0.75 ± 2.54         | -2.20 ± 2.28         | 0.68     |
| FPG (mmol/L)             | 0.07 ± 0.08          | 0.06 ± 0.10          | 0.94     |
| FPI (mU/L)               | 0.87 ± 0.63          | 0.10 ± 0.90          | 0.48     |
| HOMA-IR                  | 0.22 ± 0.15          | 0.08 ± 0.21          | 0.59     |
| C-peptide (nmol/L)       | -0.02 ± 0.03         | 0.00 ± 0.03          | 0.54     |
| TG (mmol/L)              | 0.14 ± 0.04          | 0.16 ± 0.06          | 0.82     |
| TC (mmol/L)              | -0.04 ± 0.14         | -0.06 ± 0.07         | 0.88     |
| LDL-C (mmol/L)           | 0.07 ± 0.18          | -0.06 ± 0.09         | 0.52     |
| HDL-C (mmol/L)           | 0.01 ± 0.07          | 0.01 ± 0.06          | 1.00     |
| CRP (µg/mL)              | 0.45 ± 0.40          | -0.20 ± 0.19         | 0.82     |
| MDA (nmol/mL)            | 0.01 ± 0.27          | -0.17 ± 0.31         | 0.66     |

<sup>1</sup>Ana LO change in the *Anaerostipes* abundance below the median, Ana HI change in the *Anaerostipes* abundance above the median, BMI body mass index, DBP diastolic blood pressure, SBP systolic blood pressure, FPG fasting plasma glucose, FPI fasting plasma insulin, HOMA-IR homeostasis model assessment of insulin resistance, TG triglycerides, TC total cholesterol, LDL-C low-density lipoprotein cholesterol, HDL-C high-density lipoprotein cholesterol, CRP C-reactive protein, MDA malondialdehyde

**Table S5.** Comparison of changes in cardiometabolic biomarkers between groups based on changes in *Blautia* abundance among lactose malabsorbers<sup>1</sup>

| Parameters               | Bla LO ( <i>n</i> =16) | Bla HI ( <i>n</i> =15) | <i>P</i>    |
|--------------------------|------------------------|------------------------|-------------|
| Weight (kg)              | -0.36 ± 0.21           | -0.15 ± 0.26           | 0.54        |
| BMI (kg/m <sup>2</sup> ) | -0.12 ± 0.07           | -0.05 ± 0.21           | 0.92        |
| Body fat mass (kg)       | -0.84 ± 0.21           | -1.73 ± 0.99           | 0.49        |
| Lean mass (kg)           | 0.34 ± 0.11            | 1.22 ± 0.77            | 0.24        |
| Body fat (%)             | -1.21 ± 0.27           | -2.85 ± 1.50           | 0.33        |
| DBP (mmHg)               | -2.88 ± 1.88           | 0.67 ± 1.99            | 0.21        |
| SBP (mmHg)               | -2.94 ± 2.58           | 0.13 ± 2.17            | 0.37        |
| FPG (mmol/L)             | 0.03 ± 0.09            | 0.10 ± 0.07            | 0.58        |
| FPI (mU/L)               | 0.54 ± 0.81            | 0.45 ± 0.73            | 0.93        |
| HOMA-IR                  | 0.16 ± 0.20            | 0.15 ± 0.17            | 0.97        |
| C-peptide (nmol/L)       | 0.00 ± 0.03            | -0.02 ± 0.03           | 0.58        |
| TG (mmol/L)              | 0.19 ± 0.05            | 0.11 ± 0.05            | 0.24        |
| TC (mmol/L)              | -0.09 ± 0.08           | -0.01 ± 0.14           | 0.59        |
| LDL-C (mmol/L)           | 0.25 ± 0.09            | -0.25 ± 0.16           | <b>0.01</b> |
| HDL-C (mmol/L)           | -0.04 ± 0.06           | 0.07 ± 0.06            | 0.23        |
| CRP (µg/mL)              | 0.45 ± 0.42            | -0.20 ± 0.15           | 0.32        |
| MDA (nmol/mL)            | 0.06 ± 0.30            | -0.23 ± 0.28           | 0.47        |

<sup>1</sup>*Bla LO* change in the *Blautia* abundance below the median, *Bla HI* change in the *Blautia* abundance above the median, *BMI* body mass index, *DBP* diastolic blood pressure, *SBP* systolic blood pressure, *FPG* fasting plasma glucose, *FPI* fasting plasma insulin, *HOMA-IR* homeostasis model assessment of insulin resistance, *TG* triglycerides, *TC* total cholesterol, *LDL-C* low-density lipoprotein cholesterol, *HDL-C* high-density lipoprotein cholesterol, *CRP* C-reactive protein, *MDA* malondialdehyde

**Table S6.** Comparison of changes in cardiometabolic biomarkers between groups based on changes in *Megamonas* abundance among lactose malaborbers<sup>1</sup>

| <b>Parameters</b>        | <b>Meg LO (n=16)</b> | <b>Meg HI (n=15)</b> | <b>P</b> |
|--------------------------|----------------------|----------------------|----------|
| Weight (kg)              | -0.31 ± 0.14         | -0.19 ± 0.32         | 0.74     |
| BMI (kg/m <sup>2</sup> ) | -0.11 ± 0.05         | -0.07 ± 0.22         | 0.97     |
| Body fat mass (kg)       | -0.71 ± 0.19         | -1.87 ± 0.99         | 0.15     |
| Lean mass (kg)           | 0.28 ± 0.08          | 1.29 ± 0.76          | 0.07     |
| Body fat (%)             | -1.08 ± 0.25         | -2.98 ± 1.49         | 0.11     |
| DBP (mmHg)               | 0.38 ± 1.77          | -2.80 ± 2.12         | 0.26     |
| SBP (mmHg)               | -2.13 ± 1.84         | -0.73 ± 2.95         | 0.69     |
| FPG (mmol/L)             | 0.02 ± 0.10          | 0.11 ± 0.06          | 0.43     |
| FPI (mU/L)               | 0.18 ± 0.54          | 0.84 ± 0.97          | 0.55     |
| HOMA-IR                  | 0.06 ± 0.13          | 0.25 ± 0.23          | 0.48     |
| C-peptide (nmol/L)       | -0.02 ± 0.03         | 0.00 ± 0.03          | 0.73     |
| TG (mmol/L)              | 0.12 ± 0.05          | 0.19 ± 0.05          | 0.32     |
| TC (mmol/L)              | -0.03 ± 0.06         | -0.07 ± 0.15         | 0.80     |
| LDL-C (mmol/L)           | 0.17 ± 0.10          | -0.17 ± 0.16         | 0.09     |
| HDL-C (mmol/L)           | 0.04 ± 0.07          | -0.01 ± 0.05         | 0.60     |
| CRP (µg/mL)              | 0.38 ± 0.35          | -0.13 ± 0.29         | 0.91     |
| MDA (nmol/mL)            | -0.10 ± 0.33         | -0.07 ± 0.23         | 0.94     |

<sup>1</sup>Meg LO change in the *Megamonas* abundance below the median, Meg HI change in the *Megamonas* abundance above the median, BMI body mass index, DBP diastolic blood pressure, SBP systolic blood pressure, FPG fasting plasma glucose, FPI fasting plasma insulin, HOMA-IR homeostasis model assessment of insulin resistance, TG triglycerides, TC total cholesterol, LDL-C low-density lipoprotein cholesterol, HDL-C high-density lipoprotein cholesterol, CRP C-reactive protein, MDA malondialdehyde
